# Supplementary material for: miR-335-5P contributes to human osteoarthritis by targeting HBP1
Source: PubMed Central journal article supplement — Exp Ther Med. 2020 Nov 27;21(2):109. doi: 10.3892/etm.2020.9541 (PMC7739851; doi:10.3892/etm.2020.9541), 2020-11-27
Supplement: Supplementary_Data.pdf [file Supplementary_Data.pdf]

Figure S1. Human primary articular chondrocytes cells were identified by toluidine blue staining and type II collagen immunohistochemistry staining. (A) Toluidine blue staining (x100). (B) Type II collagen immunohistochemistry staining (x100).

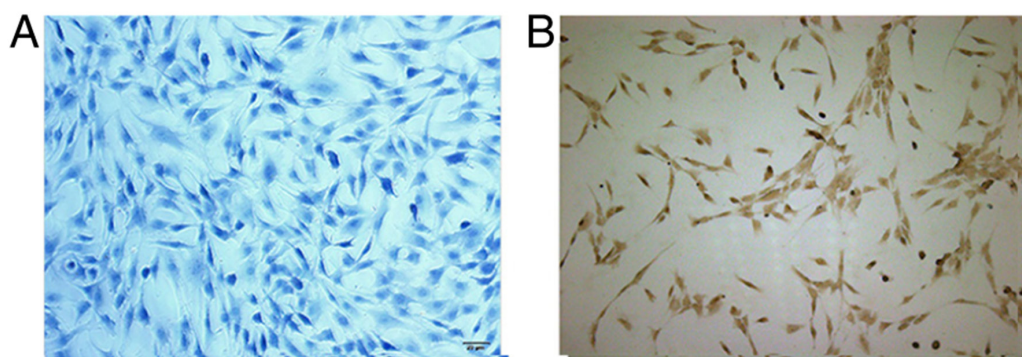

Figure S2. miR-335-5P regulates NF- $\kappa$ B pathway and inflammatory factors in human chondrocytes *in vitro*. The chondrocytes were transfected with the miR-335-5P mimic NC, miR-335-5P mimic, miR-335-5P inhibitor NC, or miR-335-5P inhibitor. After 48 h, the levels of p65 and I $\kappa$ B were analysed by Western blot (A-B) and the levels of IL-1 and IL-6 were analysed by qRT-PCR (C). \*P<0.05, \*\*P<0.01, \*\*\*P<0.001 compared to the miR-335-5P mimic NC group; #P<0.05, ###P<0.001 compared with the miR-335-5P inhibitor NC group.
